# Supplementary material for: Depression Screening Patterns, Predictors, and Trends Among Adults Without a Depression Diagnosis in Ambulatory Settings in the United States
Source: Atypon-hosted journal article supplement (doi:10.1176/appi.ps.201700439), 2018-07-09
Supplement: appi.ps.201700439.ds001.pdf [file appi.ps.201700439.ds001.pdf]

**Table 1**  
**Rates of depression screening across different years**

| <b>Year</b> | <b>Depression screening<br/>(Wt. N)</b> | <b>Total study sample<br/>(Wt. N)</b> | <b>Rate (%)</b> | <b>SE</b> | <b>95% CI</b> |
|-------------|-----------------------------------------|---------------------------------------|-----------------|-----------|---------------|
| 2005        | 9.43                                    | 691.88                                | 1.36            | 0.35      | .67-2.05      |
| 2006        | 8.84                                    | 646.62                                | 1.37            | 0.31      | .76-1.97      |
| 2007        | 7.23                                    | 706.97                                | 1.02            | 0.34      | .35-1.69      |
| 2008        | 4.53                                    | 700.09                                | 0.65            | 0.15      | .35-.95       |
| 2009        | 4.89                                    | 746.85                                | 0.66            | 0.18      | .31-1.01      |
| 2010        | 7.62                                    | 726.92                                | 1.05            | 0.28      | .49-1.60      |
| 2011        | 6.68                                    | 671.16                                | 0.99            | 0.19      | .62-1.37      |
| 2012        | 6.51                                    | 679.24                                | 0.96            | 0.15      | .66-1.26      |
| 2013        | 9.72                                    | 672.70                                | 1.44            | 0.25      | .96-1.93      |
| 2014        | 18.05                                   | 645.74                                | 2.80            | 0.39      | 2.03-3.56     |
| 2015        | 21.88                                   | 729.73                                | 3.00            | 0.54      | 1.93-4.07     |

*Note:* **Depression screening** - represents the nationally representative sample (weighted) of ambulatory care visits that received depression screening in that year (visit frequencies reported in millions);

**Total study sample** - represents the nationally representative sample (weighted) of ambulatory care visits that met all our study inclusion/exclusion criteria in that year (visit frequencies reported in millions);

**Rate** - represents the weighted percentage of depression screening rate in each year;

**SE:** Standard Error of rate

**95% CI:** Confidence Intervals of rate (%)

**Table 2**  
**Characteristics of outpatient visits by adults (age ≥ 18 years)**  
**without diagnosis of depression and predictors of depression screening**  
**NAMCS 2005-2015**

| Characteristics                   | Overall<br>Weighted % | Depression<br>Screening<br>Weighted % | No Depression<br>Screening<br>Weighted % | p-value |
|-----------------------------------|-----------------------|---------------------------------------|------------------------------------------|---------|
| <b>Age</b>                        |                       |                                       |                                          | .67     |
| 18-64 years                       | 65.54                 | 65.64                                 | 65.54                                    |         |
| 65,+ years                        | 34.46                 | 34.36                                 | 34.46                                    |         |
| <b>Gender*</b>                    |                       |                                       |                                          | .001    |
| Male                              | 40.22                 | 35.87                                 | 40.28                                    |         |
| Female                            | 59.78                 | 64.13                                 | 59.72                                    |         |
| <b>Race/Ethnicity</b>             |                       |                                       |                                          | .80     |
| White Only, Non-Hispanic          | 73.32                 | 70.70                                 | 73.35                                    |         |
| Black Only, Non-Hispanic          | 10.42                 | 11.05                                 | 10.41                                    |         |
| Hispanic                          | 10.93                 | 12.58                                 | 10.90                                    |         |
| Others                            | 5.33                  | 5.67                                  | 5.33                                     |         |
| <b>Physician Specialty*</b>       |                       |                                       |                                          | <.001   |
| General/Family/Internal           | 40.81                 | 62.17                                 | 40.51                                    |         |
| Neurologist                       | 1.64                  | 1.25                                  | 1.64                                     |         |
| Others                            | 57.55                 | 36.59                                 | 57.85                                    |         |
| <b>Metropolitan</b>               |                       |                                       |                                          | .05     |
| Metropolitan                      | 89.37                 | 91.87                                 | 89.33                                    |         |
| Non-metropolitan                  | 10.63                 | 8.13                                  | 10.67                                    |         |
| <b>Source of Payment</b>          |                       |                                       |                                          | .70     |
| Private                           | 50.44                 | 48.75                                 | 50.47                                    |         |
| Government-Medicare &<br>Medicaid | 37.43                 | 37.29                                 | 37.44                                    |         |
| Others                            | 12.12                 | 13.96                                 | 12.10                                    |         |
| <b>Geographic Region*</b>         |                       |                                       |                                          | .005    |
| West                              | 22.29                 | 14.83                                 | 22.40                                    |         |
| Northeast                         | 19.40                 | 24.95                                 | 19.32                                    |         |
| Mid-West                          | 19.79                 | 24.32                                 | 19.73                                    |         |
| South                             | 38.52                 | 35.90                                 | 38.56                                    |         |
| <b>Reason Visit</b>               |                       |                                       |                                          | .48     |
| Chronic problem, routine          | 32.76                 | 30.00                                 | 32.80                                    |         |
| Others                            | 67.24                 | 70.00                                 | 67.20                                    |         |
| <b>New Prescription</b>           |                       |                                       |                                          | .90     |
| No new meds                       | 66.44                 | 61.18                                 | 66.51                                    |         |
| 1 new med                         | 20.26                 | 22.23                                 | 20.23                                    |         |
| >=2 new meds                      | 13.30                 | 16.60                                 | 13.25                                    |         |
| <b>Past visit</b>                 |                       |                                       |                                          |         |
| None                              | 57.67                 | 58.70                                 | 57.65                                    |         |
| 1 to 2                            | 17.21                 | 17.18                                 | 17.21                                    |         |
| 3 to 5                            | 14.33                 | 13.67                                 | 14.34                                    |         |
| 6 +                               | 10.79                 | 10.45                                 | 10.80                                    |         |
| <b>Time Patient*</b>              |                       |                                       |                                          | <.001   |
| < 15 minutes                      | 19.60                 | 11.39                                 | 19.71                                    |         |

**Table 2**  
**Characteristics of outpatient visits by adults (age ≥ 18 years)**  
**without diagnosis of depression and predictors of depression screening**  
**NAMCS 2005-2015**

| <b>Characteristics</b> | <b>Overall<br/>Weighted %</b> | <b>Depression<br/>Screening<br/>Weighted %</b> | <b>No Depression<br/>Screening<br/>Weighted %</b> | <b>p-value</b> |
|------------------------|-------------------------------|------------------------------------------------|---------------------------------------------------|----------------|
| 15-29 minutes          | 58.01                         | 55.92                                          | 58.04                                             |                |
| 30-44 minutes          | 16.95                         | 23.13                                          | 16.87                                             |                |
| 45-59 minutes          | 3.23                          | 6.23                                           | 3.18                                              |                |
| ≥60 minutes            | 2.21                          | 3.33                                           | 2.19                                              |                |

*Note:* Based on 298,896 (nationally representative weighted N = 7,608,906,000) ambulatory visits of adults (age ≥ 18 years) without a diagnosis of depression using NAMCS 2005-2015 data.

*\*Statistically significant at p < 0.05.*

**Table 3**  
**Predictors of Depression Screening among Adults (age ≥ 18 years) without**  
**Depression Diagnosis**  
**NAMCS 2005-2015**

| Characteristics             | Odds Ratio | 95% CI    | p-value |
|-----------------------------|------------|-----------|---------|
| <b>Survey Year*</b>         | 1.12       | 1.06-1.18 | <.001   |
| <b>Predisposing factors</b> |            |           |         |
| <b>Age</b>                  |            |           | .67     |
| 18-64                       | Ref        |           |         |
| 65,+                        | 1.05       | .85-1.29  |         |
| <b>Gender*</b>              |            |           | .001    |
| Male                        | Ref        |           |         |
| Female                      | 1.27       | 1.10-1.47 |         |
| <b>Race/Ethnicity</b>       |            |           |         |
| White Only, Non-Hispanic    | Ref        |           |         |
| Black Only, Non-Hispanic    | .94        | .67-1.31  | .71     |
| Hispanic                    | 1.13       | .83-1.54  | .45     |
| Other                       | 1.16       | .58-2.33  | .68     |
| <b>Enabling factors</b>     |            |           |         |
| <b>Physician Specialty</b>  |            |           |         |
| General/Family/Internal*    | 2.54       | 1.89-3.40 | <.001   |
| Neurologist                 | 1.03       | .51-2.09  | .94     |
| Others                      | Ref        |           |         |
| <b>Metro</b>                |            |           | .05     |
| Metro                       | 1.54       | .99-2.38  |         |
| Non-metro                   | Ref        |           |         |
| <b>Source of Payment</b>    |            |           |         |
| Private                     | .83        | .53-1.28  | .39     |
| Government-Medicare         | .83        | .52-1.34  | .45     |
| Others                      | Ref        |           |         |
| <b>Geographic Region*</b>   |            |           |         |
| Northeast                   | Ref        |           |         |
| West                        | .49        | .31-.79   | .003    |
| Mid-West                    | 1.03       | .68-1.56  | .89     |
| South                       | .77        | .51-1.16  | .22     |
| <b>Need factors</b>         |            |           |         |
| <b>Reason Visit</b>         |            |           | .48     |
| Chronic problem, routine    | .93        | .77-1.13  |         |
| Others                      | Ref        |           |         |
| <b>New Prescription</b>     |            |           |         |
| No new meds                 | Ref        |           |         |
| 1 new med                   | 1.01       | .88-1.15  | .90     |
| >= 2 new meds               | 1.05       | .85-1.30  | .65     |
| <b>Past Visit</b>           |            |           |         |
| 6 or more                   | Ref        |           |         |
| None                        | .96        | .73-1.27  | .79     |
| 1 to 2                      | 1.08       | .80-1.45  | .62     |

**Table 3**  
**Predictors of Depression Screening among Adults (age ≥ 18 years) without**  
**Depression Diagnosis**  
**NAMCS 2005-2015**

| Characteristics      | Odds Ratio | 95% CI    | p-value |
|----------------------|------------|-----------|---------|
| 3 to 5               | 1.00       | .74-1.34  | .97     |
| <b>Time Patient*</b> |            |           |         |
| < 15 minutes         | Ref        |           |         |
| 15-29 minutes        | 1.55       | 1.12-2.14 | .01     |
| 30-44 minutes        | 2.09       | 1.45-3.03 | <.001   |
| 45-59 minutes        | 3.26       | 1.73-6.14 | .003    |
| ≥60 minutes          | 2.78       | 1.72-4.49 | <.001   |

*Note:* Based on 298,896 (nationally representative weighted N = 7,608,906,000) ambulatory visits of adults (age ≥ 18 years) without a diagnosis of depression using NAMCS 2005-2015 data.

*Abbreviations* Ref: reference group; CI: confidence interval; Sig: significance.

\*Statistically significant at  $p < .05$ .

**Table 4**  
**Odds Ratios and 95% CI from Piecewise Regression to assess**  
**the trend in Depression Screening before and after USPSTF**  
**Depression screening recommendation in 2009**

|                                                     | <b>Odds ratio</b> | <b>95% CI</b> | <b>p-value</b> |
|-----------------------------------------------------|-------------------|---------------|----------------|
| Pre-recommendation period (2005-2008) *             | .78               | .65-.91       | .002           |
| Post- recommendation period (immediate 2010-2011) * | 1.46              | 1.07-1.98     | .016           |
| Post- recommendation period (late 2012-2015) *      | 1.34              | 1.21-1.49     | <.001          |

*Note:* Based on 298,896 (nationally representative weighted N = 7,608,906,000) ambulatory visits of adults (age ≥ 18 years) without a diagnosis of depression using NAMCS 2005-2015 data.

*Abbreviations* CI: confidence interval.

\*Statistically significant at  $p < .05$ .
